# Supplementary material
Source: PubMed Central journal article supplement (PMC5111817)

**SUPPLEMENTAL MATERIAL**

**Supplemental Table 1. General Characteristics of 1,818 Participants enrolled in the echocardiographic ancillary study of The Hispanic Community Health Study / Study of Latinos (ECHO-SOL) by diabetes status.**

| Variable                                                | Mean±SD or unweighted N (weighted%) |              |             |
|---------------------------------------------------------|-------------------------------------|--------------|-------------|
|                                                         | Non-Diabetic                        | Pre-diabetic | Diabetic    |
| Age, Mean                                               | 52.7±0.4                            | 57.3±0.6     | 58.9±0.5    |
| Male                                                    | 172 (36.67)                         | 264 (45.44)  | 192 (44.75) |
| Hypertension                                            | 182 (33.76)                         | 331 (49.94)  | 343 (67.20) |
| Renal disease§                                          | 331 (59.58)                         | 461 (64.78)  | 271 (53.84) |
| Body Mass Index, mean                                   | 28.2±0.3                            | 30.5±0.5     | 31.7±0.3    |
| Body Mass Index ≥ 30 kg/m <sup>2</sup>                  | 170 (32.10)                         | 331 (44.03)  | 318 (57.94) |
| Current Alcohol Use                                     | 243 (46.94)                         | 350 (46.65)  | 172 (35.09) |
| Current Tobacco Use                                     | 89 (17.45)                          | 131 (18.72)  | 81 (15.93)  |
| Health Insurance                                        | 276 (54.45)                         | 408 (59.07)  | 350 (67.88) |
| Education, Less than high school                        | 154 (27.96)                         | 262 (33.96)  | 226 (43.14) |
| Income below 20,000 US Dollars                          | 246 (49.73)                         | 359 (52.45)  | 291 (62.79) |
| <b>Hispanic Subgroup Distribution</b>                   |                                     |              |             |
| Dominican                                               | 89 (15.92)                          | 149 (19.93)  | 88 (18.46)  |
| Central American                                        | 52 (5.88)                           | 79 (6.18)    | 44 (7.07)   |
| Cuban American                                          | 114 (28.71)                         | 149 (34.07)  | 92 (31.31)  |
| Mexican American                                        | 148 (25.32)                         | 174 (17.66)  | 131 (19.26) |
| Puerto Rican                                            | 79 (15.70)                          | 140 (17.37)  | 124 (18.02) |
| South American                                          | 60 (8.48)                           | 52 (4.80)    | 38 (5.89)   |
| <b>Echocardiographic Variables</b>                      |                                     |              |             |
| Left Atrial Volume Index >29 ml/m <sup>2</sup>          | 104 (17.21)                         | 124 (17.30)  | 87 (16.60)  |
| Left Atrial Volume Index >34 ml/m <sup>2</sup>          | 41 (6.6)                            | 39 (6.4)     | 41 (8.0)    |
| Early diastolic mitral annular velocity (E') < 8 cm/sec | 199 (33.63)                         | 371 (53.84)  | 331(69.54)  |
| E/E' ratio > 10                                         | 158 (25.47)                         | 300 (42.70)  | 285 (54.96) |
| No LV Diastolic Dysfunction                             | 310 (63.66)                         | 334 (42.87)  | 154 (28.70) |
| LV Diastolic Dysfunction, Grade 1                       | 38 (6.60)                           | 110 (17.97)  | 118 (27.99) |
| LV Diastolic Dysfunction, Grade 2                       | 165 (26.78)                         | 276 (38.00)  | 228 (41.82) |
| LV Diastolic Dysfunction, Grade 3                       | 19 (2.96)                           | 11 (1.17)    | 11 (1.49)   |
| Ejection Fraction, %                                    | 60.1±0.3                            | 60.2±0.3     | 58.9±0.4    |
| End Systolic Volume, ml                                 | 33.7±0.7                            | 33.8±0.4     | 34.0±0.8    |
| End Diastolic Volume, ml                                | 84.1±1.5                            | 84.2±1.0     | 81.9±1.4    |

\*Data are presented as mean  $\pm$  SEM or N (%) using weighted row percentages; N's presented are unweighted counts of total participants in the HCHS-SOL with respective characteristic. It is HCHS/SOL publication policy to present weighted percents but unweighted percents can be calculated based on unweighted Ns presented. The number of participants with missing data for select variables are summarized as follows: renal disease, n=5; BMI, n=1; alcohol use, n=1; cigarette use, n=2; health insurance, n=20; educational status, n=39; income, n=131; LAVI, n=37; (E') < 8 cm/sec, n=10; E/E' ratio > 10 , n=21; diastolic dysfunction, n=32;

**Supplemental Table 2. General Characteristics of 1,818 Participants enrolled in the echocardiographic ancillary study of The Hispanic Community Health Study / Study of Latinos (ECHO-SOL) by controlled diabetes status.**

| Variable                                                | Mean±SD or unweighted N (weighted%) |             |
|---------------------------------------------------------|-------------------------------------|-------------|
|                                                         | Uncontrolled                        | Controlled  |
| Age, Mean                                               | 57.87±0.78                          | 59.73±0.69  |
| Male                                                    | 95 (45.15)                          | 97 (44.04)  |
| Hypertension                                            | 169 (71.40)                         | 177 (63.94) |
| Renal disease§                                          | 120 (53.33)                         | 154 (54.39) |
| Body Mass Index, mean                                   | 31.99±0.48                          | 31.35±0.38  |
| Body Mass Index ≥ kg/m <sup>2</sup>                     | 160 (59.40)                         | 159 (56.42) |
| Current Alcohol Use                                     | 80 (34.90)                          | 94 (35.30)  |
| Current Tobacco Use                                     | 44 (19.97)                          | 38 (12.86)  |
| Health Insurance                                        | 158 (64.83)                         | 195 (70.18) |
| Education, Less than high school                        | 110 (44.43)                         | 118 (42.15) |
| Income below 20,000 US Dollars                          | 149 (60.67)                         | 143 (65.51) |
| <b>Hispanic Subgroup Distribution</b>                   |                                     |             |
| Dominican                                               | 35 (18.37)                          | 53 (18.37)  |
| Central American                                        | 22 (9.67)                           | 22 (5.00)   |
| Cuban American                                          | 43 (25.86)                          | 49 (35.24)  |
| Mexican American                                        | 64 (17.13)                          | 70 (21.25)  |
| Puerto Rican                                            | 62 (22.73)                          | 64 (14.59)  |
| South American                                          | 18 (6.24)                           | 20 (5.56)   |
| <b>Echocardiographic Variables</b>                      |                                     |             |
| Left Atrial Volume Index >29 ml/m <sup>2</sup>          | 45 (19.63)                          | 44 (14.54)  |
| Left Atrial Volume Index >34 ml/m <sup>2</sup>          | 20 (8.6)                            | 22 (7.7)    |
| Early diastolic mitral annular velocity (E') < 8 cm/sec | 167 (73.65)                         | 168 (66.44) |
| E/E' ratio > 10                                         | 144 (58.15)                         | 144 (52.58) |
| No LV Diastolic Dysfunction                             | 61 (23.65)                          | 95 (32.59)  |
| LV Diastolic Dysfunction, Grade 1                       | 69 (34.92)                          | 51 (22.94)  |
| LV Diastolic Dysfunction, Grade 2                       | 102 (39.36)                         | 127 (43.43) |
| LV Diastolic Dysfunction, Grade 3                       | 7 (2.07)                            | 4 (1.04)    |
| Ejection Fraction, %                                    | 58.21±0.62                          | 59.36±0.39  |
| End Systolic Volume, ml                                 | 34.43±1.34                          | 33.55±0.96  |
| End Diastolic Volume, ml                                | 81.03±1.87                          | 82.49±2.11  |

\*Data are presented as mean ± SEM or N (%) using weighted row percentages; N's presented are unweighted counts of total participants in the HCHS-SOL with respective characteristic.

**Supplemental Table 3. General Characteristics of 1,818 Participants enrolled in the echocardiographic ancillary study of The Hispanic Community Health Study / Study of Latinos (ECHO-SOL) by HOMA quintiles.**

| Variable                                                | Mean±SD or unweighted N (weighted%) |             |             |             |             |
|---------------------------------------------------------|-------------------------------------|-------------|-------------|-------------|-------------|
|                                                         | Quintile 1                          | Quintile 2  | Quintile 3  | Quintile 4  | Quintile 5  |
| Age, Mean                                               | 54.54±0.68                          | 55.68±0.71  | 57.13±0.90  | 57.29±0.59  | 56.81±0.58  |
| Male                                                    | 102 (47.23)                         | 104 (33.97) | 144 (41.70) | 125 (42.82) | 149 (49.36) |
| Hypertension                                            | 98 (35.05)                          | 154 (47.27) | 172 (49.74) | 192 (52.95) | 235 (61.83) |
| Renal disease§                                          | 178 (65.11)                         | 206 (54.86) | 239 (64.61) | 230 (65.65) | 204 (51.80) |
| Body Mass Index, mean                                   | 25.67±0.28                          | 28.41±0.30  | 30.21±0.74  | 31.16±0.29  | 34.20±0.37  |
| Body Mass Index ≥30 kg/m <sup>2</sup>                   | 37 (10.46)                          | 97 (32.10)  | 176 (44.13) | 213 (55.94) | 293 (72.41) |
| Current Alcohol Use                                     | 149 (54.01)                         | 159 (41.22) | 168 (45.22) | 140 (41.76) | 144 (37.69) |
| Current Tobacco Use                                     | 67 (22.59)                          | 67 (19.47)  | 50 (14.02)  | 56 (16.39)  | 59 (16.90)  |
| Health Insurance                                        | 155 (54.88)                         | 198 (58.13) | 237 (65.97) | 217 (58.95) | 220 (60.66) |
| Education, Less than high school                        | 100 (36.31)                         | 124 (31.93) | 129 (31.48) | 134 (37.97) | 151 (37.52) |
| Income below 20,000 US Dollars                          | 136 (50.63)                         | 166 (52.88) | 191 (47.48) | 195 (63.63) | 202 (58.39) |
| <b>Echocardiographic Variables</b>                      |                                     |             |             |             |             |
| Dominican                                               | 59 (19.93)                          | 74 (16.86)  | 92 (27.96)  | 62 (17.45)  | 39 (9.17)   |
| Central American                                        | 20 (5.09)                           | 27 (3.85)   | 33 (4.63)   | 41 (9.25)   | 53 (8.87)   |
| Cuban American                                          | 50 (28.98)                          | 61 (27.93)  | 83 (31.51)  | 68 (32.55)  | 92 (37.39)  |
| Mexican American                                        | 81 (27.22)                          | 103 (27.27) | 89 (14.26)  | 91 (16.69)  | 87 (18.42)  |
| Puerto Rican                                            | 51 (12.54)                          | 56 (18.34)  | 64 (15.95)  | 77 (16.05)  | 90 (20.77)  |
| South American                                          | 28 (6.24)                           | 33 (5.76)   | 32 (5.69)   | 29 (8.02)   | 27 (5.39)   |
| <b>Echocardiographic Variables</b>                      |                                     |             |             |             |             |
| Left Atrial Volume Index >29 ml/m <sup>2</sup>          | 59 (18.67)                          | 71 (20.22)  | 74 (16.87)  | 64 (15.97)  | 47 (14.19)  |
| Left Atrial Volume Index >34 ml/m <sup>2</sup>          | 21 (5.5)                            | 29 (10.4)   | 23 (4.8)    | 25 (6.7)    | 23 (7.0)    |
| Early diastolic mitral annular velocity (E') < 8 cm/sec | 104 (36.34)                         | 146 (40.74) | 187 (54.92) | 206 (57.91) | 255 (68.73) |
| E/E' ratio > 10                                         | 90 (26.42)                          | 134 (37.15) | 149 (41.78) | 173 (49.34) | 193 (48.61) |
| No LV Diastolic Dysfunction                             | 167 (63.92)                         | 168 (51.72) | 183 (42.21) | 140 (37.27) | 135 (33.33) |
| LV Diastolic Dysfunction, Grade 1                       | 24 (7.18)                           | 32 (9.32)   | 53 (18.44)  | 70 (23.85)  | 85 (26.81)  |
| LV Diastolic Dysfunction, Grade 2                       | 87 (27.17)                          | 136 (35.90) | 142 (38.08) | 148 (38.04) | 154 (38.00) |
| LV Diastolic Dysfunction, Grade 3                       | 8 (1.74)                            | 11 (3.06)   | 6 (1.26)    | 5 (0.83)    | 10 (1.87)   |
| Ejection Fraction, %                                    | 59.94±0.39                          | 60.71±0.40  | 59.95±0.36  | 59.44±0.38  | 58.89±0.35  |
| End Systolic Volume, ml                                 | 33.59±0.87                          | 33.67±0.89  | 33.81±0.62  | 33.40±0.73  | 34.60±0.82  |
| End Diastolic Volume, ml                                | 82.98±1.76                          | 85.30±1.77  | 83.71±1.27  | 82.05±1.58  | 83.64±1.58  |

\*Data are presented as mean ± SEM or N (%) using weighted row percentages; N's presented are unweighted counts of total participants in the HCHS-SOL with respective characteristic.

**Supplemental Table 4. HbA1C and change in cardiac structure and function adjusted for age, sex, site, smoking status, alcohol use, physical activity level, body mass index and hypertension. Results presented as estimated beta coefficients (SE) or odds ratio (95%CI) as appropriate. From echocardiographic ancillary study of The Hispanic Community Health Study / Study of Latinos (ECHO-SOL).**

| <b>Cardiac Structure</b>                                 | <b>p-value</b> | <b>Systolic Function</b>                     | <b>p-value</b> | <b>Diastolic Function</b>                                             | <b>p-value</b> |
|----------------------------------------------------------|----------------|----------------------------------------------|----------------|-----------------------------------------------------------------------|----------------|
| <b>LV Mass Index 2.7</b>                                 |                | <b>End Diastolic Volume, MOD-biplane(ml)</b> |                | <b>E/e' Lateral Ratio</b>                                             |                |
| 0.60 (0.26)                                              | 0.02           | -1.71 (0.53)                                 | 0.002          | 0.27 (0.07)                                                           | 0.0002         |
| <b>LV mass (grams/m<sup>2</sup>)</b>                     |                | <b>End Systolic Volume, MOD-biplane (ml)</b> |                | <b>E/e' Septal Ratio</b>                                              |                |
| 1.51 (0.52)                                              | 0.004          | -0.23 (0.35)                                 | 0.51           | 0.43 (0.08)                                                           | <0.0001        |
| <b>LV Posterior Wall at diastole (cm)</b>                |                | <b>Ejection Fraction (MOD-biplane)%</b>      |                | <b>LA Volume Index</b>                                                |                |
| 0.01 (0.005)                                             | 0.005          | -0.45 (0.16)                                 | 0.01           | -0.13 (0.15)                                                          | 0.37           |
| <b>Inter-ventricular Septal Diameter (cm)</b>            |                | <b>Fractional Shortening (%)</b>             |                | <b>Lateral Peak e' Velocity (cm/s)</b>                                |                |
| 0.02 (0.004)                                             | <0.0001        | -0.17 (0.18)                                 | 0.36           | -0.25 (0.06)                                                          | <0.0001        |
| <b>Relative Wall Thickness</b>                           |                | <b>Lateral Peak S Velocity (cm/s)</b>        |                | <b>Medial Peak e' Velocity (cm/s)</b>                                 |                |
| 0.01 (0.003)                                             | 0.0005         | -0.08 (0.05)                                 | 0.11           | -0.22 (0.04)                                                          | <0.0001        |
| <b>LV Geometry (Odds Ratios for abnormal vs. normal)</b> |                | <b>Stroke Volume (LVOT) ml</b>               |                | <b>Diastolic Dysfunction (Odds Ratios for grade I-III vs. normal)</b> |                |
| 1.13 (1.0-1.3)                                           | 0.03           | -1.27 (0.38)                                 | 0.0008         | 1.24 (1.1-1.4)                                                        | <0.0001        |

**Supplemental Table 5. Measures of cardiac structure and function according to HOMA-IR quintiles excluding participants with cardiovascular disease and kidney disease, adjusted for age, sex, site, smoking status, alcohol use, physical activity level, body mass index and hypertension. Results presented as mean(SE) or odds ratio(95%CI) as appropriate. From echocardiographic ancillary study of The Hispanic Community Health Study / Study of Latinos (ECHO-SOL).**

| Cardiac Structure                                               |                              |                   |                   |                 |         | Systolic Function                           |                                  |                              |                 |                 |         | Diastolic Function                                                   |                                  |                              |                              |                 |         |
|-----------------------------------------------------------------|------------------------------|-------------------|-------------------|-----------------|---------|---------------------------------------------|----------------------------------|------------------------------|-----------------|-----------------|---------|----------------------------------------------------------------------|----------------------------------|------------------------------|------------------------------|-----------------|---------|
| Q1                                                              | Q2                           | Q3                | Q4                | Q5              | P-Value | Q1                                          | Q2                               | Q3                           | Q4              | Q5              | P-Value | Q1                                                                   | Q2                               | Q3                           | Q4                           | Q5              | P-Value |
| <b>Left Ventricular Mass Index(2.7)</b>                         |                              |                   |                   |                 |         | <b>Ejection Fraction (MOD- biplane)%</b>    |                                  |                              |                 |                 |         | <b>E/e' Lateral Ratio</b>                                            |                                  |                              |                              |                 |         |
| 41.45<br>(1.33)                                                 | 40.03<br>(0.72)              | 39.65<br>(0.82)   | 39.31<br>(0.79)   | 40.16<br>(1.03) | 0.58    | 59.63<br>(0.61)                             | 61.00<br>(0.52)                  | 59.93<br>(0.39)              | 60.60<br>(0.51) | 60.07<br>(0.52) | 0.20    | 8.67<br>(0.27)                                                       | 8.97<br>(0.18)                   | 8.85<br>(0.20)               | 8.51<br>(0.23)               | 8.85<br>(0.44)  | 0.42    |
| <b>LV mass grams/m<sup>2</sup></b>                              |                              |                   |                   |                 |         | <b>Fractional Shortening (%)</b>            |                                  |                              |                 |                 |         | <b>E/e' Septal Ratio</b>                                             |                                  |                              |                              |                 |         |
| 83.56<br>(0.90) <sup>1,2,3,4</sup>                              | 80.91<br>(0.47) <sup>3</sup> | 79.73<br>(0.73)   | 79.36<br>(0.68)   | 81.25<br>(0.91) | 0.001   | 29.25<br>(0.59) <sup>3</sup>                | 29.81<br>(0.63)                  | 29.91<br>(0.42)              | 30.86<br>(0.57) | 30.74<br>(0.70) | 0.27    | 10.63<br>(0.25) <sup>1,2,4</sup>                                     | 11.29<br>(0.26)                  | 11.49<br>(0.22)              | 11.19<br>(0.24)              | 11.58<br>(0.34) | 0.09    |
| <b>Left Ventricular Posterior Wall(diastole) Thickness (cm)</b> |                              |                   |                   |                 |         | <b>Lateral Peak S Vel cm/sec</b>            |                                  |                              |                 |                 |         | <b>Left Atrial Volume Index</b>                                      |                                  |                              |                              |                 |         |
| 0.85<br>(0.02)                                                  | 0.85<br>(0.01)               | 0.86<br>(0.02)    | 0.86<br>(0.02)    | 0.88<br>(0.02)  | 0.75    | 7.90<br>(0.23) <sup>1,2,4</sup>             | 8.82<br>(0.25)                   | 8.49<br>(0.18)               | 8.49<br>(0.23)  | 8.69<br>(0.21)  | 0.004   | 23.46<br>(0.23) <sup>1,4</sup>                                       | 24.63<br>(0.29) <sup>2,3,4</sup> | 23.19<br>(0.29) <sup>4</sup> | 23.24<br>(0.43) <sup>4</sup> | 21.94<br>(0.36) | <0.0001 |
| <b>Inter-ventricular Septum (diastole) Thickness (cm)</b>       |                              |                   |                   |                 |         | <b>Stroke Volume (LVOT)ml</b>               |                                  |                              |                 |                 |         | <b>Lateral Peak e' Vel cm/sec</b>                                    |                                  |                              |                              |                 |         |
| 1.04<br>(0.02)                                                  | 1.06<br>(0.01)               | 1.06<br>(0.02)    | 1.05<br>(0.02)    | 1.07<br>(0.02)  | 0.83    | 76.00<br>(2.01) <sup>3,4</sup>              | 73.29<br>(1.70)                  | 71.98<br>(1.48)              | 69.89<br>(1.81) | 68.99<br>(1.66) | 0.06    | 9.54<br>(0.21)                                                       | 9.59<br>(0.22) <sup>4</sup>      | 9.39<br>(0.21)               | 9.19<br>(0.21)               | 8.92<br>(0.24)  | 0.32    |
| <b>Relative Wall Thickness</b>                                  |                              |                   |                   |                 |         | <b>End Diastolic Volume(MOD-biplane) ml</b> |                                  |                              |                 |                 |         | <b>Medial Peak e' Vel cm/sec</b>                                     |                                  |                              |                              |                 |         |
| 0.36<br>(0.01) <sup>2,4</sup>                                   | 0.38<br>(0.01)               | 0.39<br>(0.01)    | 0.38<br>(0.01)    | 0.40<br>(0.01)  | 0.12    | 88.64<br>(1.93) <sup>3,4</sup>              | 90.29<br>(1.81) <sup>2,3,4</sup> | 84.59<br>(1.53) <sup>4</sup> | 82.16<br>(1.91) | 79.00<br>(1.99) | 0.0002  | 7.56<br>(0.18) <sup>2,3,4</sup>                                      | 7.47<br>(0.15) <sup>2,3,4</sup>  | 6.93<br>(0.12)               | 6.93<br>(0.14)               | 6.64<br>(0.15)  | <0.001  |
| <b>LV Geometry (Odds Ratios for abnormal vs. normal)</b>        |                              |                   |                   |                 |         | <b>End Systolic Volume(MOD-biplane) ml</b>  |                                  |                              |                 |                 |         | <b>Diastolic Dysfunction(Odds Ratios for grade I-III vs. normal)</b> |                                  |                              |                              |                 |         |
| 0.69<br>(0.3-1.4)                                               | 0.66<br>(0.3-1.3)            | 0.63<br>(0.3-1.2) | 1.03<br>(0.6-1.8) | 1.00            | 0.46    | 36.30<br>(1.01) <sup>3,4</sup>              | 35.66<br>(1.01) <sup>3,4</sup>   | 34.05<br>(0.72) <sup>4</sup> | 32.54<br>(0.80) | 31.48<br>(0.81) | 0.0006  | 0.63<br>(0.3-1.3)                                                    | 0.98<br>(0.5-1.9)                | 1.21<br>(0.7-2.0)            | 1.46<br>(0.9-2.5)            | 1.00            | 0.10    |

- 1: p<0.05 for comparison with HOMA 2.
- 2: p<0.05 for comparison with HOMA 3.
- 3: p<0.05 for comparison with HOMA 4.
- 4: p<0.05 for comparison with HOMA 5.

**SUPPLEMENTAL FIGURE 1:** Relationship between diabetes status (a) or diabetes control (b) and LV geometry. Adjusted for age, sex, site, smoking status, alcohol use, physical activity level, body mass index, hypertension and chronic kidney disease.

**Supplemental Figure 1A**

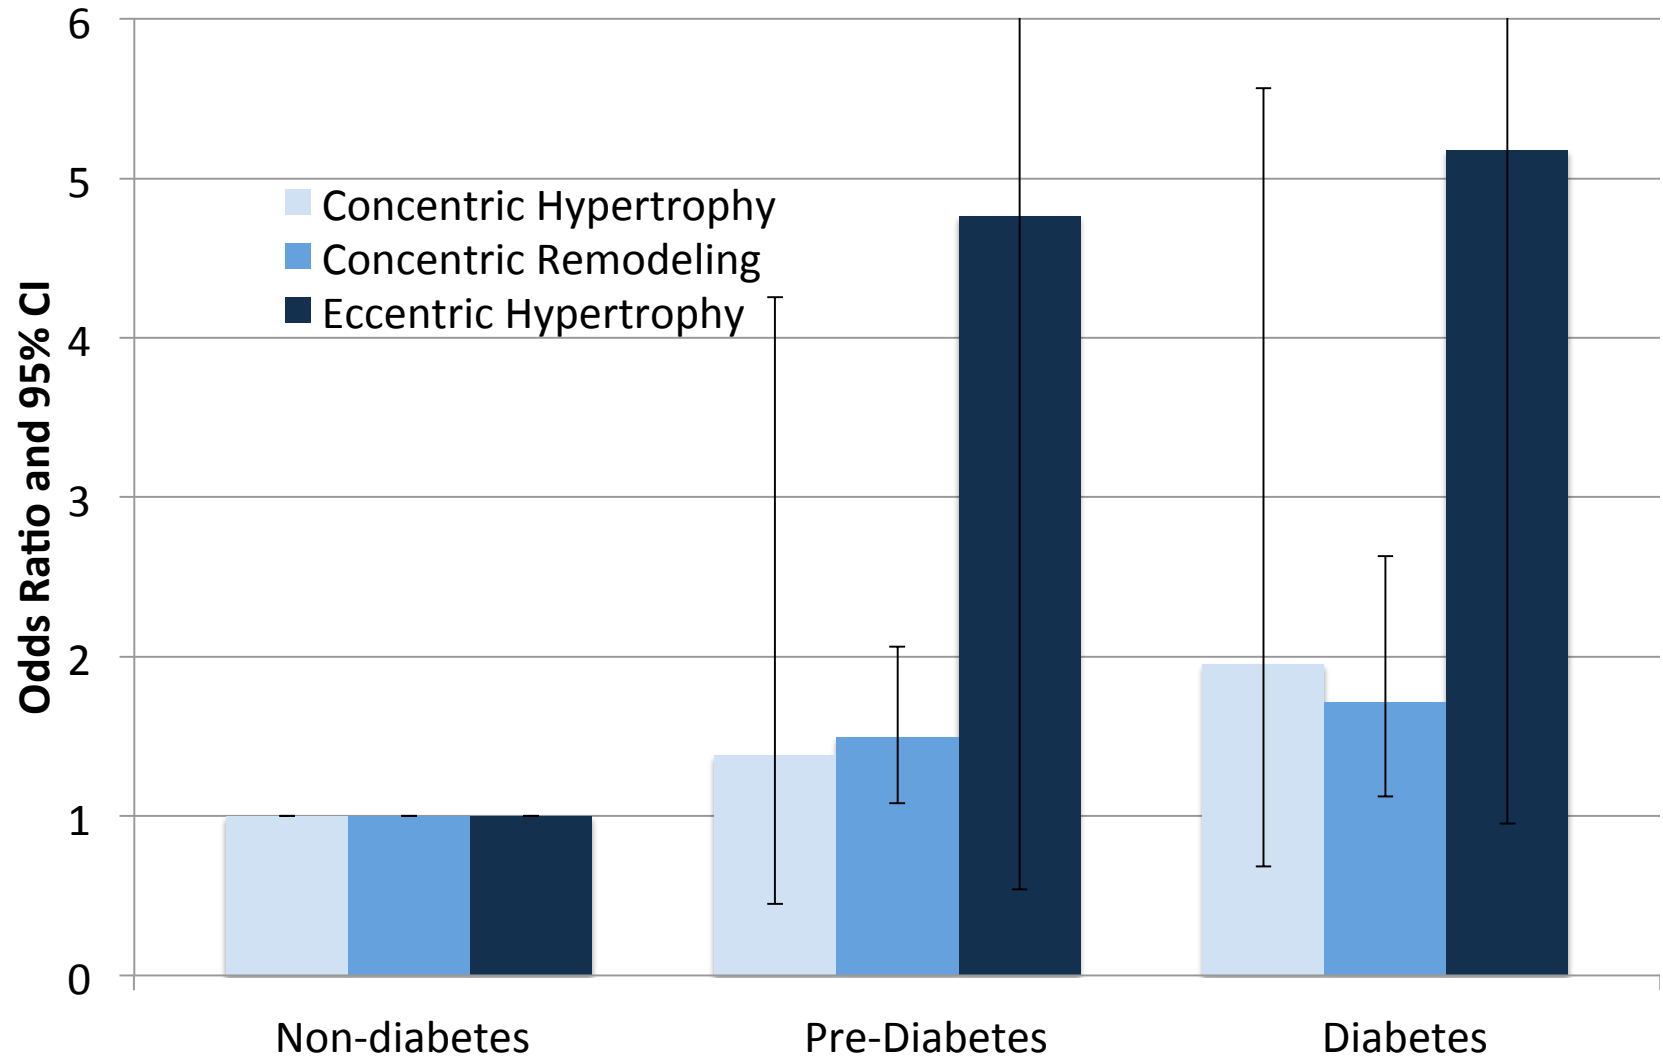



Supplemental Figure 1B

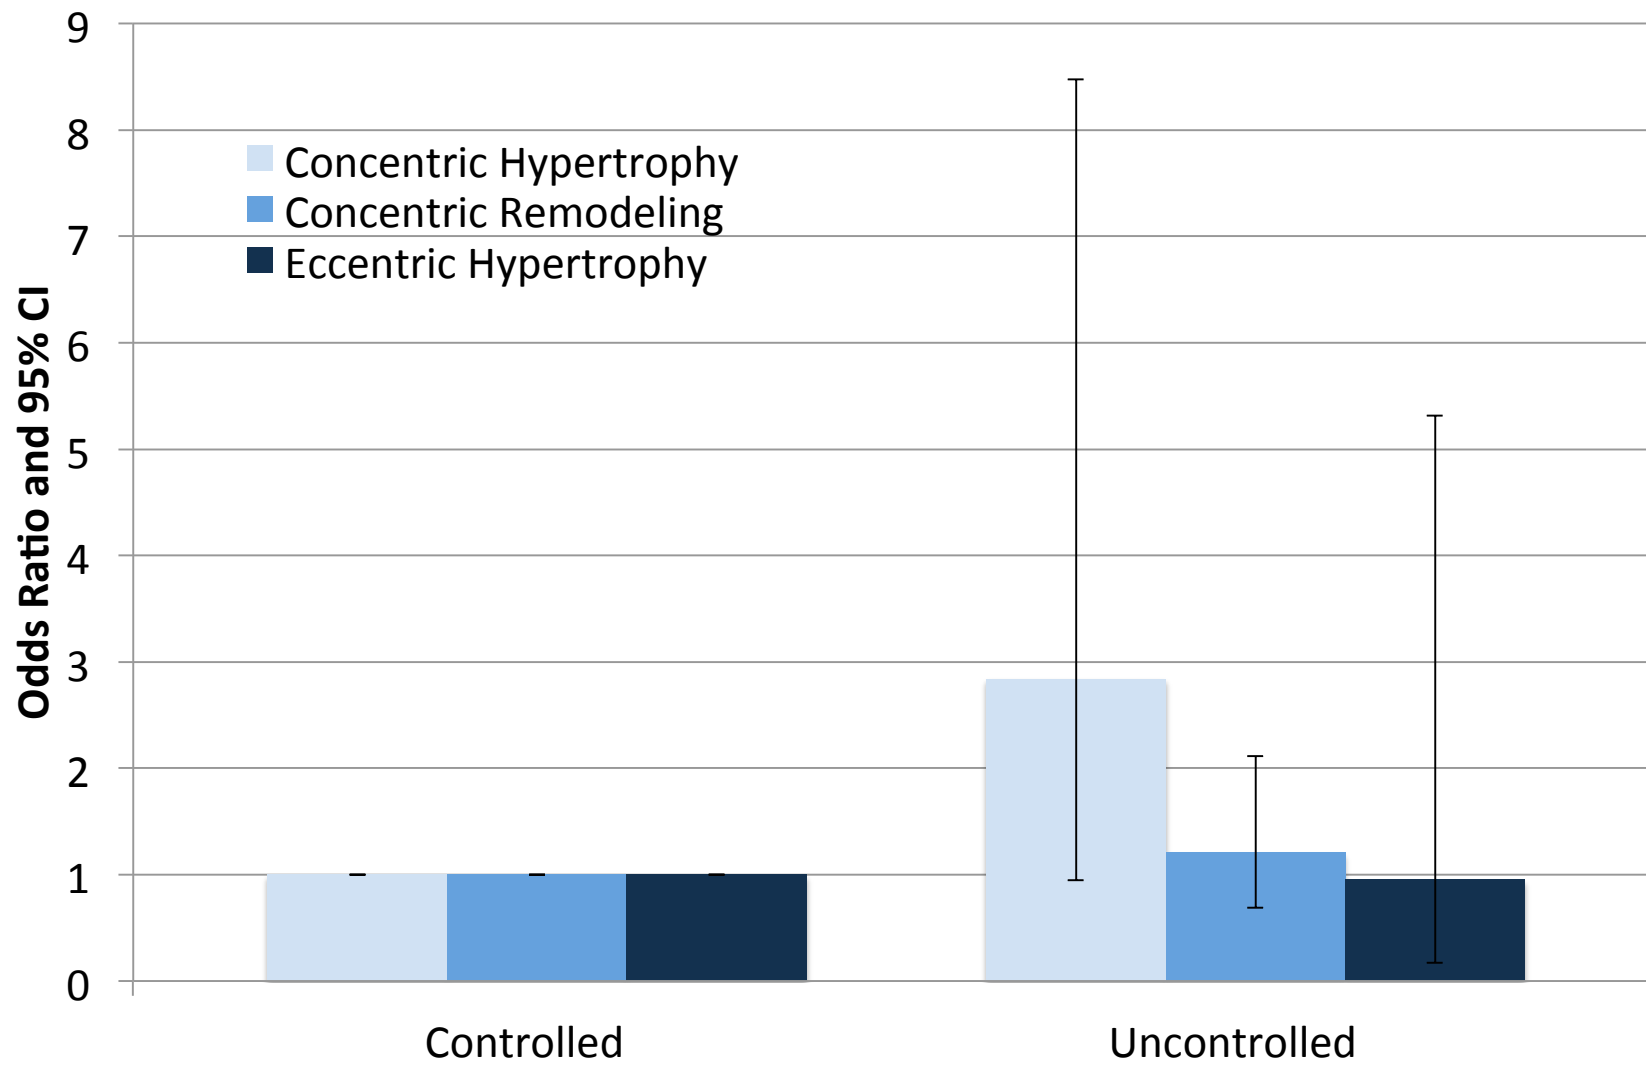

Supplement: NIHMS817968-supplement-Supplemental_Material.pdf [file NIHMS817968-supplement-Supplemental_Material.pdf]
